# Supplementary material
Source: publisher figshare collection journal article supplement (https://gsajournals.figshare.com/ndownloader/files/26450993)
Supplement: Supplementary file 1 [file 26450993]

**Figure S1: Cohesin protein expression in cohesin variant mESCs, Related to Figure 2.**

1. Levels of STAG1, STAG2, and SMC1A proteins in *Stag1* and *Stag2* variant mESCs. Nuclear extracts were immunoblotted for the indicated proteins and GAPDH as a control. Blots are representative of two experiments.
2. Levels of STAG1, STAG2, and SMC1A proteins in *Smc1a* variant mESCs. Nuclear extracts were immunoblotted for the indicated proteins and GAPDH as a control. Blots are representatitive of two experiments.
